# Supplementary material
Source: PubMed Central journal article supplement (PMC4115032)
Supplement: NIHMS595782-supplement-01.pdf [file NIHMS595782-supplement-01.pdf]

Supplemental Materials

Supplemental Figure 1

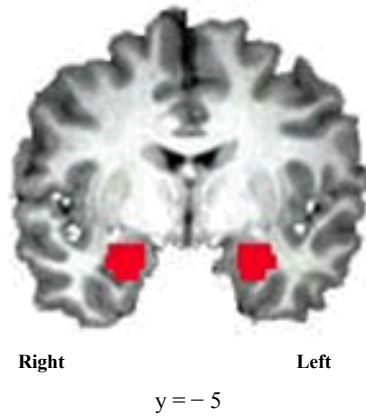

Supplemental Figure 1. Amygdala ROI. Anatomical ROI of the amygdala were determined in AFNI based on the Talairach and Tournoux (1988) coordinate system.

Supplemental Table 1. Whole brain analyses.

|                       | Hemisphere | Vol (mm <sup>3</sup> ) | Talairach coordinates |              |             |
|-----------------------|------------|------------------------|-----------------------|--------------|-------------|
|                       |            |                        | x                     | y            | z           |
| <i>Arousal</i>        |            |                        |                       |              |             |
| Lingual Gyrus         | Bilateral  | <b>36451</b>           | <b>0.9</b>            | <b>-76.6</b> | <b>-5.1</b> |
| Thalamus              | Right      | <b>1418</b>            | <b>25.7</b>           | <b>-29.7</b> | <b>3.4</b>  |
| Dorsolateral PFC      | Right      | <b>1231</b>            | <b>49.2</b>           | <b>-14.5</b> | <b>29.9</b> |
| <i>Valence</i>        |            |                        |                       |              |             |
| Middle Temporal Gyrus | Left       | <b>2631</b>            | <b>-50.0</b>          | <b>-57.0</b> | <b>-2.2</b> |

*Note:* Location, volumes, and coordinates from Talairach and Tournoux (1988) for the center of mass for areas of activation. Significance threshold criteria:  $p < 0.005$  and cluster size of 788 mm<sup>3</sup> (14 voxels of 3.75 × 3.75 × 4.00 mm dimension) resulted in  $p < 0.05$ . Significance criteria:  $t[20] > 3.16$ ,  $p < 0.05$  (corrected),  $d = 0.69$ .
